# Supplementary material
Source: HighWire-hosted journal article supplement (http://jmg.bmjjournals.com/highwire/filestream/160713/field_highwire_adjunct_files/0/Web_only_table5_and_fig_3_and_4_web_only_aug_8.pdf)

**Table 6 (web only) Multivariate analysis of prognostic factors- Europe only population**

| Variable                                              | Chi-Squared  | Significance   | Goodness of fit |
|-------------------------------------------------------|--------------|----------------|-----------------|
| <b>Cardiac n=320</b>                                  |              |                |                 |
| eGFR<br>( $< 60\text{ml}/\text{min}/1.73\text{m}^2$ ) | 39.16        | $<0.001$       | 0.9135          |
| Hearing impairment <sup>s</sup>                       | Not included |                |                 |
| LVM index<br>( $\geq 50\text{ g}/\text{m}^2$ )        | 13.26        | $<0.001$       |                 |
| Proteinuria ( $>300\text{mg}/24$<br>hour)             | 11.36        | $<0.001$       |                 |
| Presence of vertigo                                   | 15.01        | $<0.001$       |                 |
| Presence of Abnormal<br>ECG                           | 4.29         | $<0.05$        |                 |
| Presence of<br>Anhidrosis/Hypohidrosis                | 4.19         | $<0.05$        |                 |
| Presence of<br>Angiokeratomas or<br>telangectasias    | *            | $\ll 0.0001^*$ |                 |

| <b>Renal n=179</b>                                  |                 |                                          |        |
|-----------------------------------------------------|-----------------|------------------------------------------|--------|
| eGFR<br>( $< 60 \text{ ml/min/1.73m}^2$ )           | 52.13           | $<0.001$                                 | 0.9250 |
| Male Gender                                         | 18.99           | $<0.001$                                 |        |
| Proteinuria ( $>300\text{mg}/24$<br>hours)          | 4.75            | $<0.05$                                  |        |
| Presence of<br>Angiokeratomas or<br>telangiectasias |                 | All patients had yes<br>on this variable |        |
| <b>Neuro n=320</b>                                  |                 |                                          |        |
| Hearing impairment <sup>s</sup>                     | 12.18           | $<0.001$                                 | 0.3388 |
| eGFR<br>( $< 60 \text{ ml/min/1.73m}^2$ )           | 16.18           | $<0.001$                                 |        |
| Presence of Vertigo                                 | Not<br>included |                                          |        |
| Presence of Anhidrosis/<br>Hypohidrosis             | 6.90            | $<0.01$                                  |        |
| <b>Death n=320</b>                                  |                 |                                          |        |
| eGFR<br>( $< 60 \text{ ml/min/1.73m}^2$ )           | 17.05           | $<0.001$                                 | 0.5178 |
| Presence of Abnormal<br>ECG                         | 7.65            | $<0.05$                                  |        |

| <b>Composite n=320</b>                           |                 |          | 0.3048 |
|--------------------------------------------------|-----------------|----------|--------|
| eGFR<br>( $< 60$ , ml/min/1.73m <sup>2</sup> )   | 74.51           | $<0.001$ |        |
| Hearing impairment <sup>§</sup>                  | 30.85           | $<0.001$ |        |
| Microalbuminuria                                 | 5.67            | $<0.01$  |        |
| LVM index<br>( $\geq 50$ g/m <sup>2</sup> )      | 7.26            | $<0.01$  |        |
| Presence of anhidrosis/<br>hypohidrosis<br>(Y/N) | Not<br>included |          |        |
| Proteinuria<br><br>*( $>300$ mg/24hour)          | 13.31           | $<0.001$ |        |

\* Added

<sup>§</sup> Hearing impairment is average pure tone audiometric thresholds at 0.5, 1 & 2 kHz in one or both ears  $> 25$  dB ISO

Figure 3 (web only)

**Kaplan-Meier Analysis of Predictive Scores - Europe only population**

- (a) Cardiac score
- (b) Renal score
- (c) Neurological
- (d) Composite

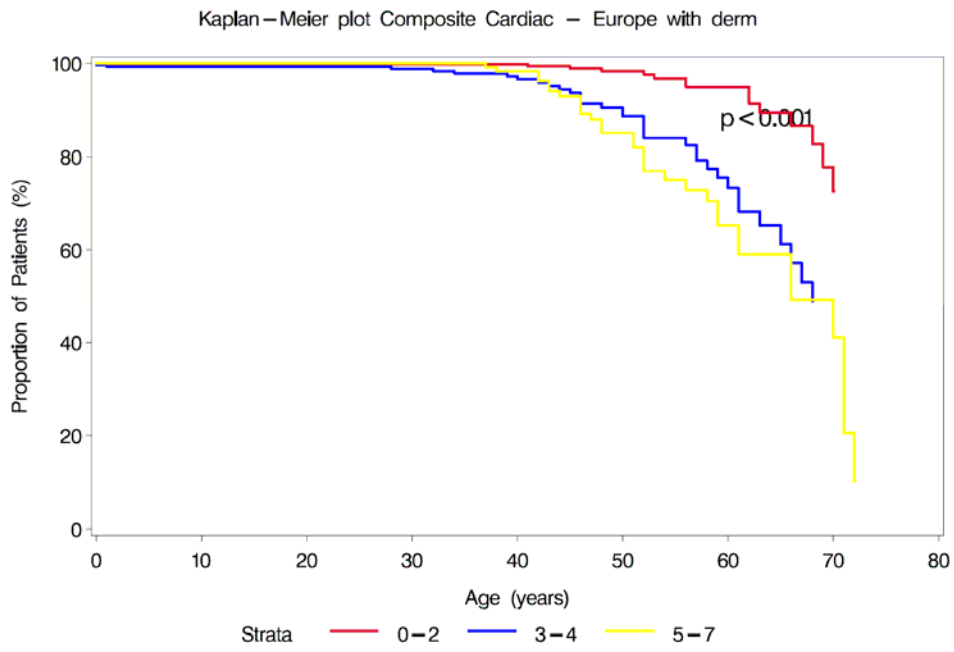

Kaplan–Meier plot composite Renal - Europe

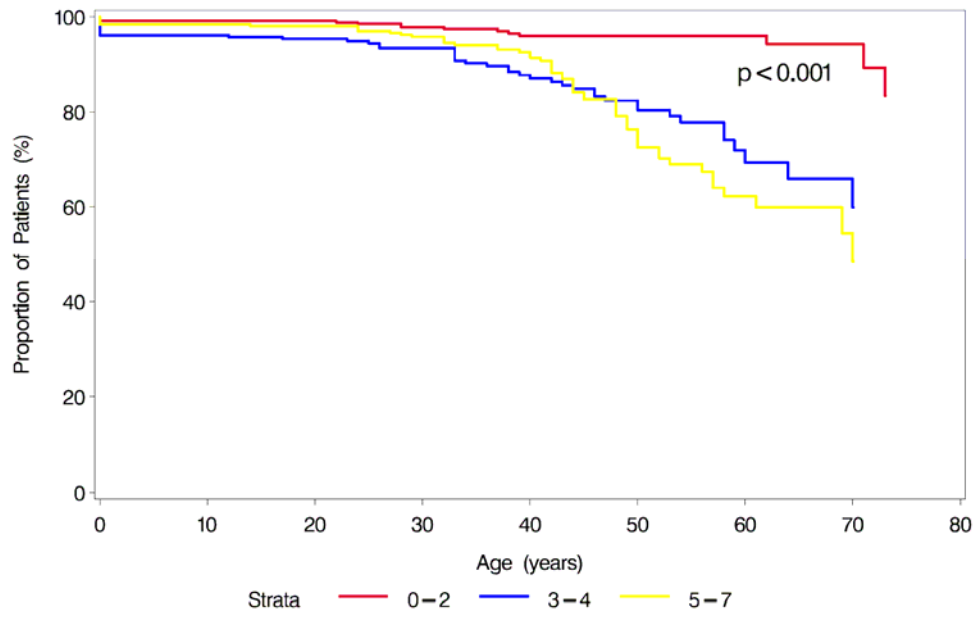

Kaplan–Meier plot Composite CNS - Europe

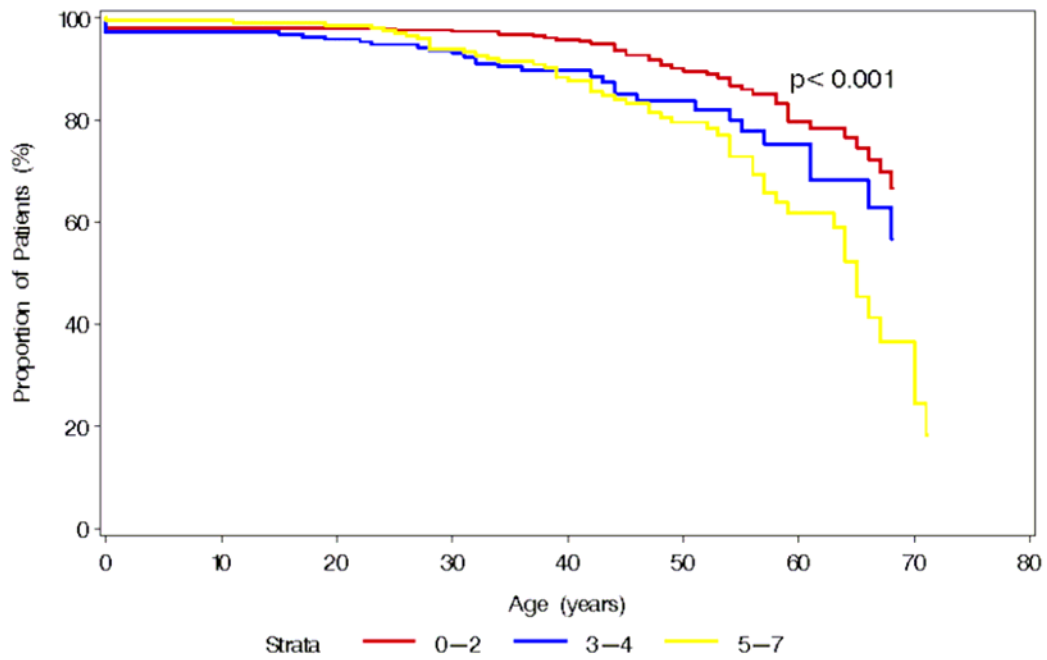

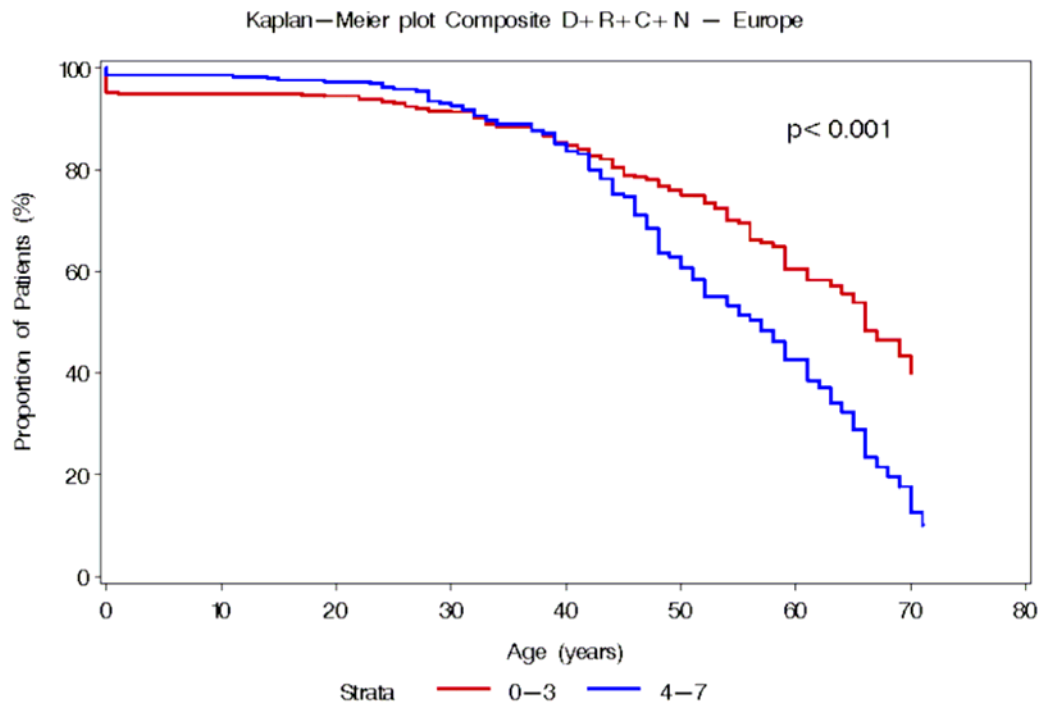

**Figure 4 (web only) Kaplan-Meier Analysis of Predictive Scores- Randomly selected population**

- (a) Cardiac score
- (b) Renal score
- (c) Neurological
- (d) Composite

Kaplan-Meier plot Cardiac - rand

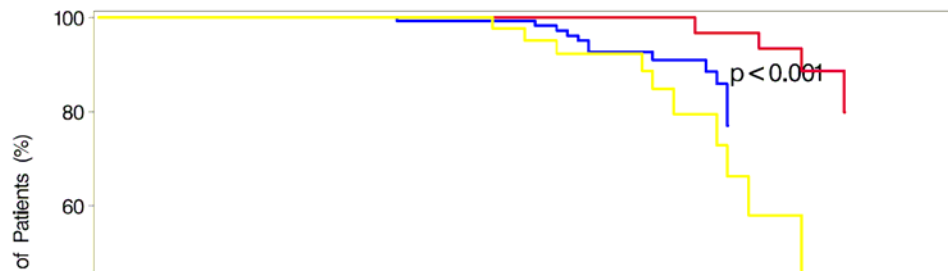

Supplement: Web_only_table5_and_fig_3_and_4_web_only_aug_8.pdf [file Web_only_table5_and_fig_3_and_4_web_only_aug_8.pdf]
